# Supplementary material
Source: ML conference proceedings conference paper supplement (https://openreview.net/forum?id=PNU2mPauvd)
Supplement: supplementary_material [file UAT_Supplementary.pdf › Supplementary/UAT_Supplementary.pdf]

---

# Beyond Greedy Exits: Improved Early Exit Decisions for Risk Control and Reliability (Supplementary)

---

Anonymous Author(s)

Affiliation

Address

email

## 1 Source Code

We provide the links to the source code in the supplementary material, where we provide two anonymized repositories for different task implementations. A unified merged code will be publicly released soon. The source code links are: <https://anonymous.4open.science/r/UAT-59AD/README.md> and <https://anonymous.4open.science/r/UAT-BERT-5D9D/README.md>.

## 2 Theorem 4.1 Proof (Refer this one)

**Note: The proof of Theorem 1 given in the original submission appendix has some notation issues, please refer to this proof.**

**Theorem 4.1.** *Let  $(1 - C_g^i)$  approximates the value of  $p_\tau(\hat{y} = y|x, \hat{y})$  with probability  $(1 - \delta_1)$ . Let the risk associated with  $\tau^*$  be bounded by  $\epsilon^*$ . Then, for sufficiently large  $T$  and given tolerance  $\epsilon$ , UAT achieves  $\mathbb{P}(\hat{\mathcal{R}}(\pi) \leq \epsilon^d) \geq (1 - \delta_1)(1 - \delta')$ , where  $\epsilon^d = \epsilon + \epsilon^*$ ,  $\lambda \leq \frac{\epsilon}{L}$  and  $\delta'$  is a constant.*

**Proof:**

Before moving to prove the theorem, we will first bound the single-run regret of the UAT algorithm.

At each round  $t = 1, 2, \dots, T$ , the algorithm selects an arm  $\tau_t$  and receives a reward  $r(\tau_t)$ .

Regret Definition: We define the realized (actual) regret for a single run as:

$$R(T) = \sum_{t=1}^T (\mu^* - \mu_{A_t}) = \sum_{i=1}^K \Delta_i N_i(T),$$

where  $N_i(T)$  is the number of times arm  $i$  was pulled up to time  $T$ .

The UAT Algorithm: At each time  $t$ , the UAT algorithm selects the arm

$$\tau_t = \arg \max_i \left( \hat{\mu}_i(t) + \sqrt{\frac{2 \log T}{N_i(t)}} \right),$$

where:  $\hat{\mu}_i(t)$  is the empirical mean reward of arm  $i$  up to time  $t$ .  $N_i(t)$  is the number of times arm  $i$  has been pulled until time  $t$ .

High-Probability Bound Using Hoeffding's Inequality: By Hoeffding's inequality, for any  $n \geq 1$  and any  $\epsilon > 0$ :

$$\mathbb{P} [|\hat{\mu}_i - \mu_i| \geq \epsilon] \leq 2 \exp(-2n\epsilon^2).$$

Define the confidence interval:

$$\text{CI}_i(t) = \left[ \hat{\mu}_i(t) - \sqrt{\frac{2 \log T}{N_i(t)}}, \hat{\mu}_i(t) + \sqrt{\frac{2 \log T}{N_i(t)}} \right].$$

23 In one particular round, true reward mean for  $i$ th arm lies in this interval with probability  $1 - \delta$  where  
 24  $\delta = 1/T^2$

25 Using the union bound over all arms and times, with probability at least  $1 - 1/T$  that the true reward  
 26 mean lies in the interval over all the rounds.

27 **Bounding the Number of Suboptimal Pulls:** Let us bound  $N_i(T)$  for any suboptimal arm  $i$  with  
 28  $\Delta_i > 0$ .

29 Suppose arm  $i$  is selected at time  $t$ . For this to happen, the UAT index for arm  $i$  must be at least as  
 30 large as that for the optimal arm  $i^*$ :

$$\hat{\mu}_i(t) + \sqrt{\frac{2 \log T}{N_i(t)}} \geq \hat{\mu}_{i^*}(t) + \sqrt{\frac{2 \log T}{N_{i^*}(t)}}.$$

31 If all confidence intervals are valid (which occurs with high probability), then:

$$\mu_i + 2\sqrt{\frac{2 \log T}{N_i(t)}} \geq \mu^*.$$

32 Rearranging,

$$\sqrt{\frac{2 \log T}{N_i(t)}} \geq \frac{\Delta_i}{2} \Rightarrow N_i(t) \leq \frac{8 \log T}{\Delta_i^2}.$$

33 Thus, the number of times arm  $i$  is pulled is at most:

$$N_i(T) \leq \left\lceil \frac{8 \log T}{\Delta_i^2} \right\rceil + 1.$$

34 **Total Regret Bound:** Using  $R(T) = \sum_{i: \Delta_i > 0} \Delta_i N_i(T)$ , we obtain:

$$R(T) \leq \sum_{i: \Delta_i > 0} \Delta_i \left( \frac{8 \log T}{\Delta_i^2} + 1 \right) = \sum_{i: \Delta_i > 0} \left( \frac{8 \log T}{\Delta_i} + \Delta_i \right).$$

35 Finally: With probability at least  $1 - \mathcal{O}(1/T)$ , the realized regret of UAT satisfies:

$$R(T) \leq \sum_{i: \Delta_i > 0} \left( \frac{8 \log T}{\Delta_i} + \Delta_i \right) = \beta(T)$$

36 Let  $p_\tau(\hat{y}|x)$  denote the model's confidence and  $p_\tau(y = \hat{y}|x, \hat{y})$  its calibrated correctness probability.  
 37 The empirical risk could be written as:

$$\hat{\mathcal{R}}(\pi) \triangleq 1 - \frac{1}{T} \sum_{t=1}^T p_\tau(y = \hat{y}|x, \hat{y})$$

38 The UAT algorithm that provides a threshold  $\tau_t = \pi(x_t)$  using the policy  $\pi$ , for simplicity, we drop  
 39 the index  $t$ . With probability atleast  $\delta' = 1 - \frac{1}{T}$ , the single run regret of UAT algorithm can be  
 40 bounded as:

$$R(T) \leq \beta(T)$$

41 where the reward  $r(\tau) = C_\tau^i \cdot (1 - C_g^i) - \lambda \cdot i = p_\tau(\hat{y}|x) \cdot p_\tau(y = \hat{y}|x, \hat{y}) - \lambda i$  as we consider  
 42  $(1 - C_g^i)$  approximates the  $p_\tau(y = \hat{y}|x, \hat{y})$  with probability  $\delta_1$ . Choose  $\delta = (1 - \delta_1)(1 - \delta')$  then  
 43 with probability  $\delta$ :

$$\sum_{t=1}^T [p_{\tau^*}(\hat{y}|x) p_{\tau^*}(y = \hat{y}|x, \hat{y}) - p_\tau(\hat{y}|x) p_\tau(y = \hat{y}|x, \hat{y}) - \lambda(i - i^*)] \leq \beta(T) \quad (1)$$

44 Rearranging terms and bounding exit differences  $|i - i^*| \leq L$ :

$$\sum_{t=1}^T (p_{\tau^*}(\cdot) - p_{\tau}(\cdot)) \leq \beta(T) + \lambda L T \quad (2)$$

45 where  $p_{\tau}(\cdot) \triangleq p_{\tau}(\hat{y}|x)p_{\tau}(y = \hat{y}|x, \hat{y})$ .

46 Using  $p_{\tau}(\hat{y}|x) \leq 1$ :

$$\sum_{t=1}^T p_{\tau}(y = \hat{y}|x, \hat{y}) \geq \sum_{t=1}^T p_{\tau}(\cdot) \geq \sum_{t=1}^T p_{\tau^*}(\cdot) - \beta(T) - \lambda L T$$

47 Dividing by  $T$  and substituting into the risk definition:

$$\hat{\mathcal{R}}(\pi) \leq 1 - \frac{1}{T} \sum_{t=1}^T p_{\tau^*}(\cdot) + \frac{\beta(T)}{T} + \lambda L$$

48 As we assume that  $\mathcal{R}^* = 1 - \frac{1}{T} \sum_{t=1}^T p_{\tau^*}(\cdot) \leq \epsilon_0$

$$\hat{\mathcal{R}}(\pi) \leq \epsilon^* + \frac{\beta(T)}{T} + \lambda L$$

49 For large  $T$ ,  $\frac{\beta(T)}{T} \rightarrow 0$  (since  $\beta(T) = \mathcal{O}(\log T)$ ). To ensure  $\hat{\mathcal{R}}(\pi) \leq \epsilon$ :

$$\lambda L \leq \epsilon^d - \epsilon_0 \implies \lambda \leq \frac{\epsilon^d - \epsilon^*}{L} = \frac{\epsilon}{L}$$

50 Therefore, if we select  $\lambda \leq \frac{\epsilon}{L}$ , then with probability at least  $\delta = (1 - \delta)(1 - \delta')$ , the empirical risk  
 51  $\hat{\mathcal{R}}(\pi)$  is bounded by  $\epsilon$ . This completes the proof.  $\square$
